# Supplementary material for: Protocol for the development of a core outcome set for stillbirth care research (iCHOOSE Study)
Source: HighWire-hosted journal article supplement (doi:10.1136/bmjopen-2021-056629), 2022-02-01
Supplement: bmjopen-2021-056629supp004_data_supplement.pdf [file bmjopen-2021-056629supp004_data_supplement.pdf]

## Supplementary material 4: Table of changes for think aloud interviews and questionnaire development

| <b><i>Delphi Questionnaire for core outcome set for research after stillbirth</i></b> |                                 |                               |                                 |                             |                      |
|---------------------------------------------------------------------------------------|---------------------------------|-------------------------------|---------------------------------|-----------------------------|----------------------|
| <b><i>Negative Comments</i></b>                                                       | <b><i>Positive Comments</i></b> | <b><i>Possible Change</i></b> | <b><i>Reason for change</i></b> | <b><i>Agreed change</i></b> | <b><i>MoScoW</i></b> |
|                                                                                       |                                 |                               |                                 |                             |                      |
|                                                                                       |                                 |                               |                                 |                             |                      |
|                                                                                       |                                 |                               |                                 |                             |                      |
|                                                                                       |                                 |                               |                                 |                             |                      |
|                                                                                       |                                 |                               |                                 |                             |                      |
|                                                                                       |                                 |                               |                                 |                             |                      |
|                                                                                       |                                 |                               |                                 |                             |                      |
|                                                                                       |                                 |                               |                                 |                             |                      |
|                                                                                       |                                 |                               |                                 |                             |                      |
|                                                                                       |                                 |                               |                                 |                             |                      |
|                                                                                       |                                 |                               |                                 |                             |                      |
|                                                                                       |                                 |                               |                                 |                             |                      |
|                                                                                       |                                 |                               |                                 |                             |                      |
|                                                                                       |                                 |                               |                                 |                             |                      |
